# Supplementary material for: Construction of Ce(OH)4nanostructures from 1D to 3D by a mechanical force-driven method
Source: Royal Society of Chemistry journal article supplement (doi:10.1039/c5ce00051c), 2015-01-01
Supplement: c5ce00051c1.pdf [file c5ce00051c1.pdf]

## Supporting information (SI)

### Construct Ce(OH)<sub>4</sub> nanostructures from 1D to 3D by mechanical force-driven method

Ke Tang<sup>a</sup>, Jingcai Zhang<sup>a</sup>, Wenzhi Wang<sup>b</sup>, Shuping Wang<sup>a</sup>, Jinxin Guo<sup>a\*</sup> and Yanzhao Yang<sup>a\*</sup>

<sup>a</sup>Key Laboratory for Special Functional Aggregate Materials of Education Ministry, School of Chemistry and Chemical Engineering, Shandong University, Jinan, 250100, P. R. China. E-mail: [yzhyang@sdu.edu.cn](mailto:yzhyang@sdu.edu.cn); [jinxinguo@sdu.edu.cn](mailto:jinxinguo@sdu.edu.cn); Fax: +86-531-88564464; Tel: +86-531-88362988

<sup>b</sup>Shandong Experiment High School, Jinan, 250001, P. R. China

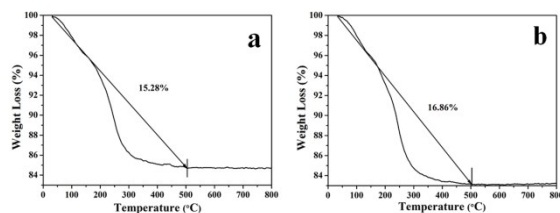

Fig. S1 TGA curves of (a) Ce(OH)<sub>4</sub>-NR, (b) Ce(OH)<sub>4</sub>-NF.

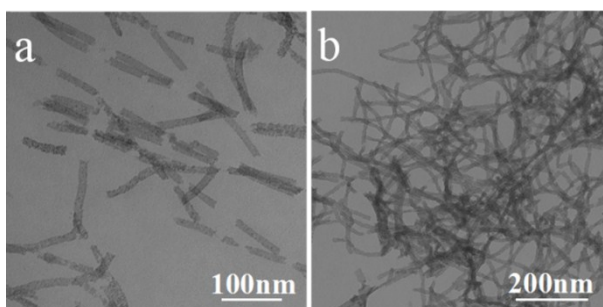

Fig. S2 TEM images of Ce(OH)<sub>4</sub>-NR obtained with different amounts of tert-butylamine (a) 3ml, (b) 1 ml.

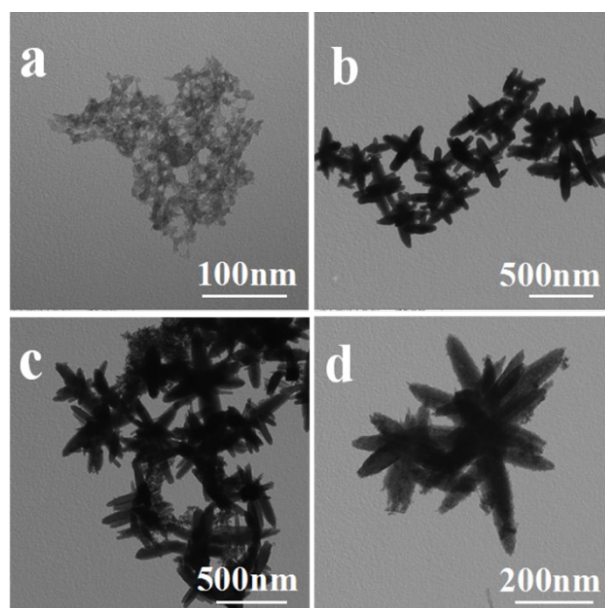

Fig. S3 TEM images of Ce(OH)<sub>4</sub>-NF obtained at different solvothermal stages (a) after adding tert-butylamine, (b) 50 min, (c) 5h, (d) 8h.

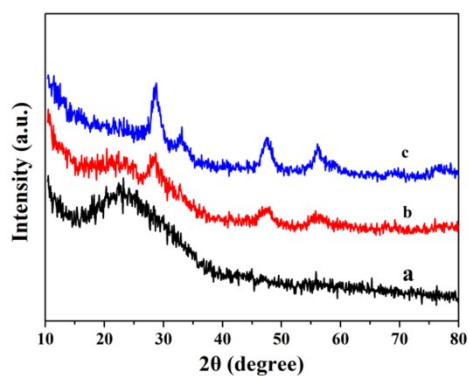

Fig. S4 XRD patterns of Ce(OH)<sub>4</sub>-NF obtained at different solvothermal stages (a) after adding tert-butylamine, (b) 50 min, (c) 5h, (d) 8h.

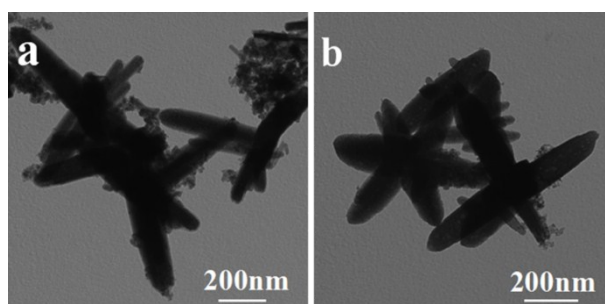

Fig. S5 TEM images of  $\text{Ce}(\text{OH})_4$  obtained under different stirring condition: (a) without any stirring, (b) under mild stirring condition.

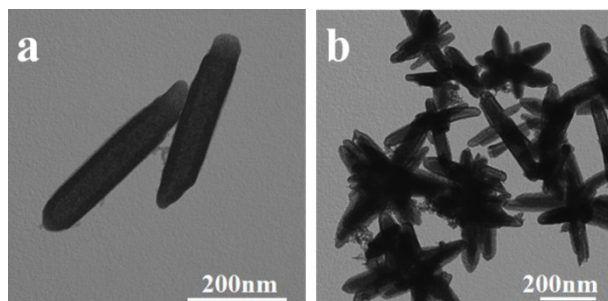

Fig. S6 TEM images of as-prepared  $\text{CeO}_2$  hollow structures: (a) overview of the  $\text{CeO}_2$  hollow nanorods, (b) overview of the  $\text{CeO}_2$  hollow nanoflowers.

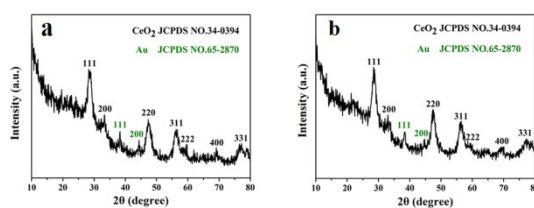

Fig. S7 XRD patterns of (a) Au/CeO<sub>2</sub>-NR, (b) Au/CeO<sub>2</sub>-NF.

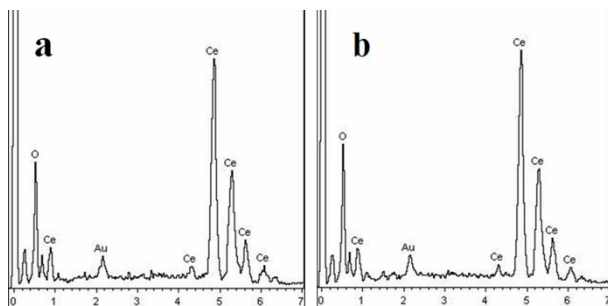

Fig. S8 EDS patterns of (a) Au/CeO<sub>2</sub>-NR, (b) Au/CeO<sub>2</sub>-NF.

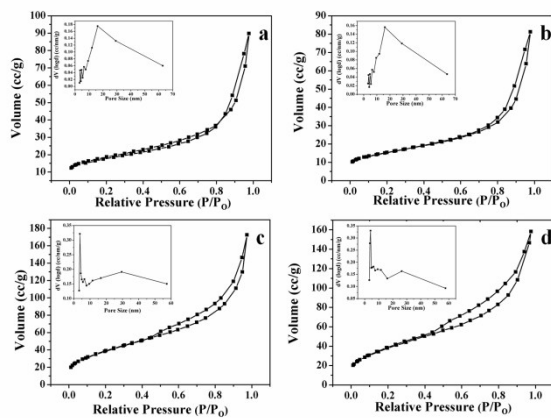

Fig. S9 N<sub>2</sub> adsorption-desorption isotherms of (a) CeO<sub>2</sub>-NR, (b) CeO<sub>2</sub>-NF, (c) Au/CeO<sub>2</sub>-NR, (d) Au/CeO<sub>2</sub>-NF. Inset images are the corresponding BJH pore size distribution curve.

Table S1

N<sub>2</sub> adsorption-desorption characterization of different samples

| Samples                                              | Commercial CeO <sub>2</sub> | CeO <sub>2</sub> -NR | CeO <sub>2</sub> -NF | Au/CeO <sub>2</sub> -NR | Au/CeO <sub>2</sub> -NF |
|------------------------------------------------------|-----------------------------|----------------------|----------------------|-------------------------|-------------------------|
| S <sub>BET</sub> (m <sup>2</sup> ·g <sup>-1</sup> )  | 8.500                       | 66.380               | 54.893               | 145.250                 | 148.463                 |
| V <sub>BJH</sub> (cm <sup>3</sup> ·g <sup>-1</sup> ) | --                          | 0.123                | 0.113                | 0.236                   | 0.215                   |
| D <sub>BJH</sub> (nm)                                | --                          | 3.699                | 3.748                | 3.808                   | 4.200                   |
